# Supplementary material for: DNA methylation repels binding of hypoxia-inducible transcription factors to maintain tumor immunotolerance
Source: PubMed Central journal article supplement (PMC7384226; doi:10.1186/s13059-020-02087-z), 2020-07-27

**SUPPLEMENTARY FIGURES**

DNA methylation repels binding of hypoxia-inducible transcription factors to maintain tumour immunotolerance

Figure S1

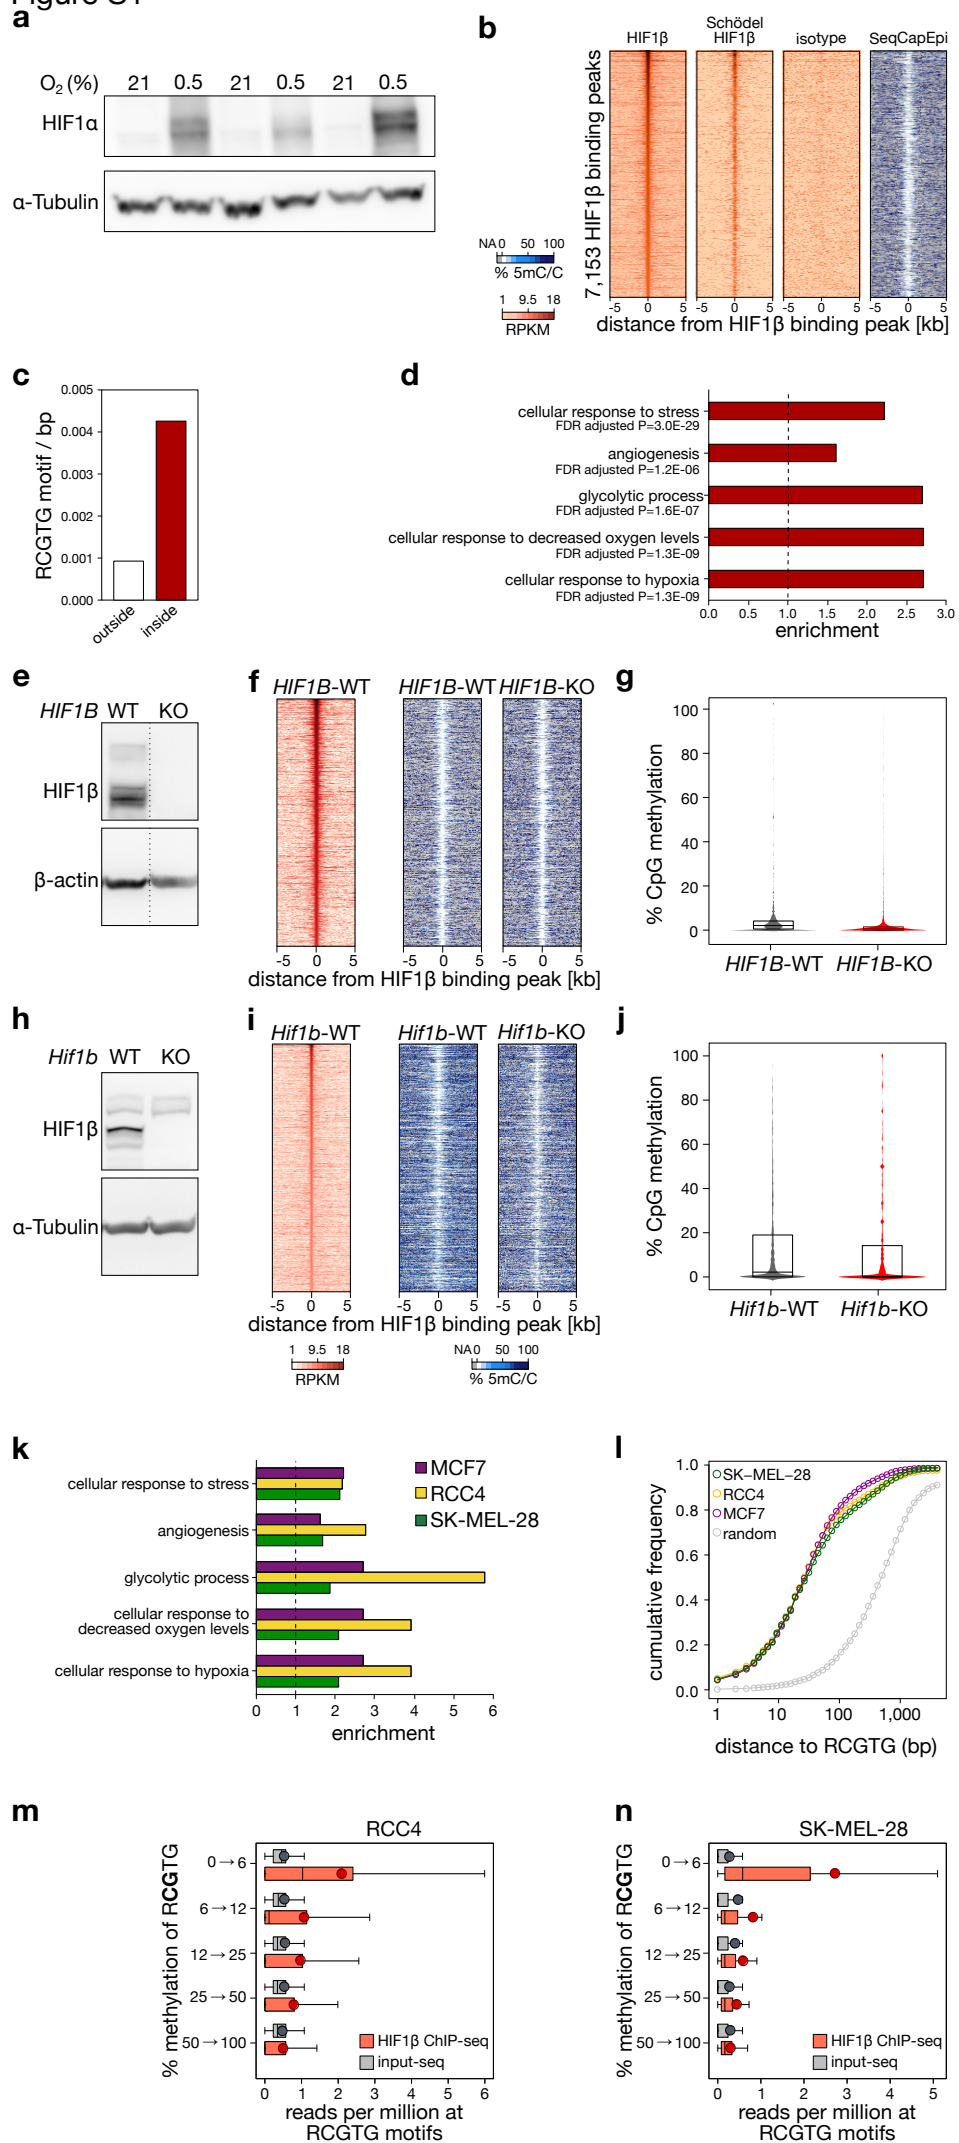

### Fig S1 | HIF1 $\beta$ peaks in MCF7 cells under 0.5% O<sub>2</sub>

(a) (*top*) Immunoblot analysis of HIF1 $\alpha$  in MCF7 cells exposed for 24 hours to 21% or 0.5% O<sub>2</sub>. (b) Comparison of the 7,153 HIF1 $\beta$  peaks detected in this study to a previously published dataset of ChIP-seq for HIF1 $\beta$ . (c) Frequency per basepair of the RCGTG motif inside and outside HIF1 $\beta$  peaks. On average, 4.6 HIF consensus sequences (RCGTG) are found in each HIF1 $\beta$  peak (average length 1,088 bps), whereas in the rest of the genome, 0.98 HIF consensus sequences (RCGTG) are found every 1,088 bps (Fisher exact test  $P < 2.2 \cdot 10^{-16}$ ). (d) Ontology analysis of genes associated with the 7,153 HIF1 $\beta$  peaks detected in MCF7 cells by ChIP-seq for HIF1 $\beta$ . (e) Immunoblot analysis of HIF1 $\beta$  in MCF7 cells that are wild-type (WT) or knockout (KO) for HIF1 $\beta$ . (f-g) Heatmaps of HIF1 $\beta$  binding for WT MCF7 cells and of DNA methylation for WT and *HIF1B*-KO MCF7 cells, at regions surrounding the HIF1 $\beta$  ChIP-seq peak summit in WT MCF7 cells ( $\pm 5$  kb) (f), and violin and boxplots of methylation at the HIF1 $\beta$  ChIP-seq peak summit ( $\pm 100$  bps) for WT and *HIF1B*-KO MCF7 cells (g). Depicted are the data from the 4,794 regions having  $>30$ -fold methylation coverage for both genotypes (WT and KO) in the 100 bps flanking the binding summit, as assessed using SeqCapEpi BS-seq. HIF1 $\beta$  binding was assessed after 16 hours of 0.5% O<sub>2</sub> (hypoxia), and DNA methylation under 21% O<sub>2</sub> (normoxia). (h) Immunoblot analysis of HIF1 $\beta$  in mESCs that are wild-type (WT) or knockout (KO) for *Hif1b*. (i, j) Heatmaps of HIF1 $\beta$  binding for ESCs and of DNA methylation for murine WT and *Hif1b*-KO ESCs, at regions surrounding the HIF1 $\beta$  ChIP-seq peak summit in WT ESCs ( $\pm 5$  kb) (i), and violin and boxplots of methylation at the HIF1 $\beta$  ChIP-seq peak summit ( $\pm 100$  bps) for WT and *Hif1b*-KO ESCs (j). Depicted are the data from the 1,644 regions having  $>30$ -fold methylation-coverage for both genotypes (WT and KO) in the 100 bps flanking the binding summit, as assessed using whole-genome BS-seq. HIF1 $\beta$  binding was assessed after 16 hours of 0.5% O<sub>2</sub> (hypoxia), and DNA methylation under 21% O<sub>2</sub> (normoxia). (k) Ontology analysis of genes associated with HIF1 $\beta$  peaks in 3 cell lines (SK-MEL-28, green; RCC4, yellow; MCF7, purple). (l) Cumulative frequency of distance to the nearest RCGTG motif, for HIF1 $\beta$  binding peak summits detected in 3 cell lines and for a random set of genomic positions. (m-n) Sequencing read depth of HIF1 $\beta$  ChIP and its input, at all RCGTG sequences in RCC4 (m) and SK-MEL-28 (n) cells, stratified for methylation at the CG in the core RCGTG sequence. Shown are data for all RCGTG sequences in the human genome for which  $>10\times$  coverage was obtained after SeqCapEpi BS-seq.

Figure S2

**a**

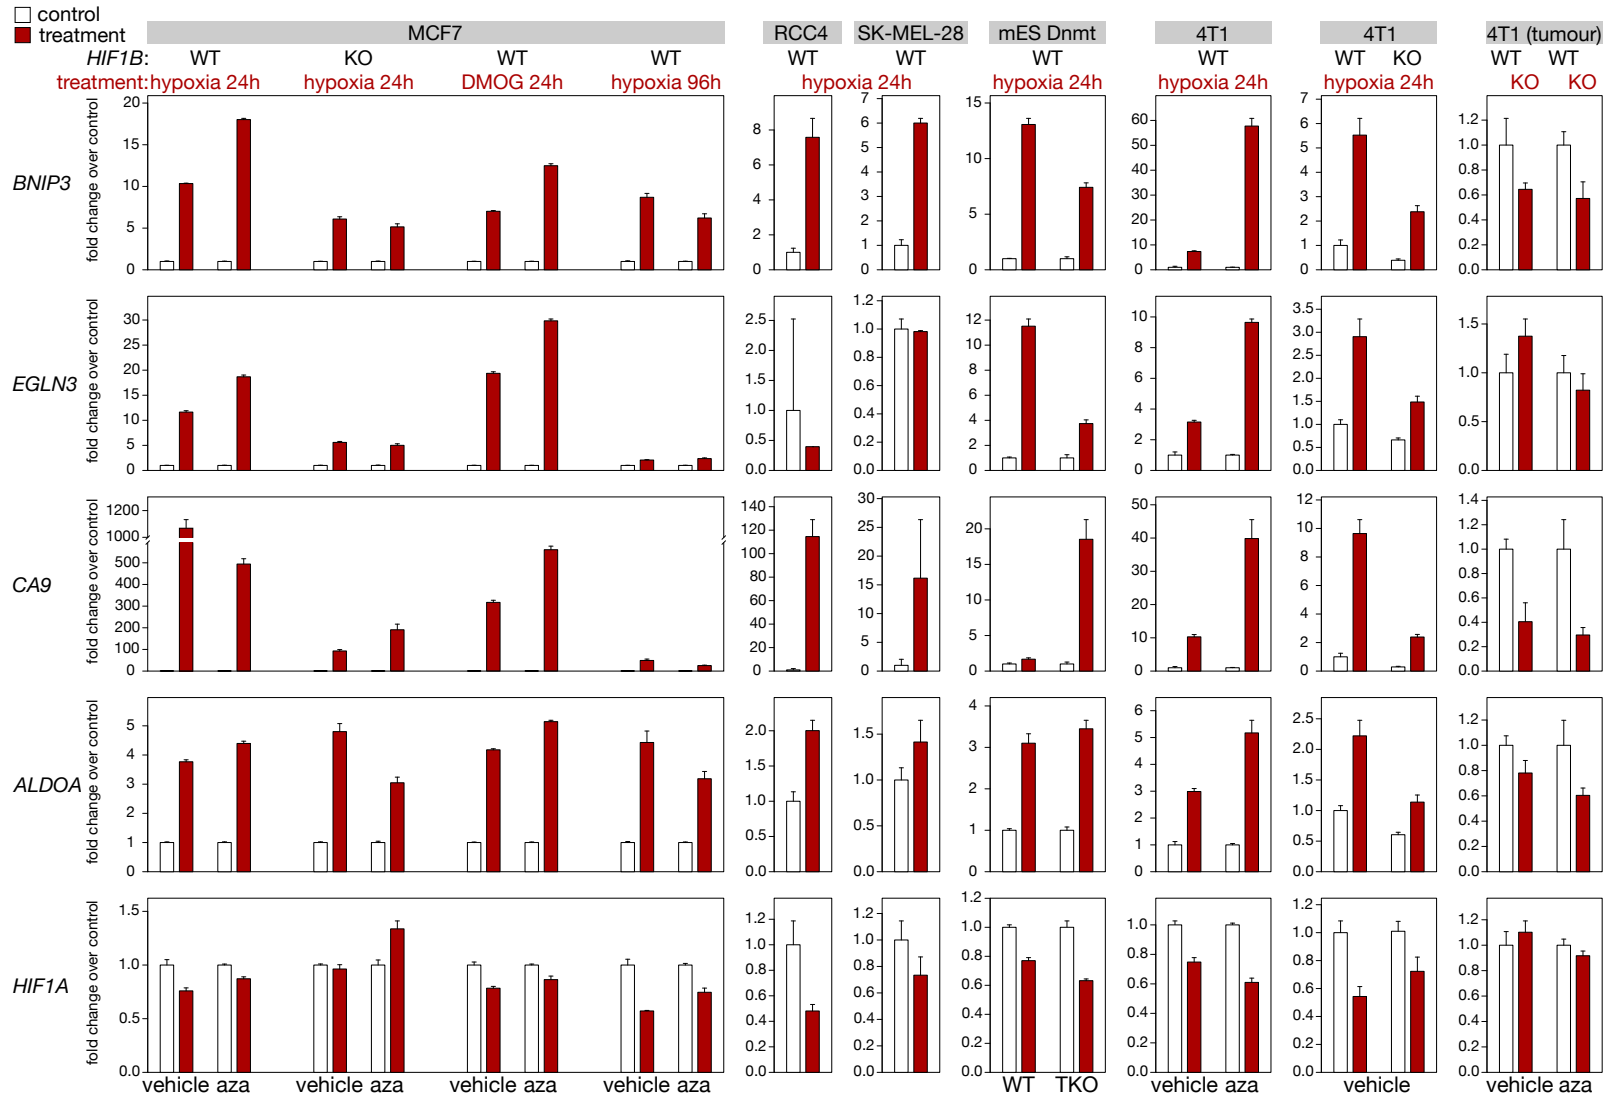

**b**

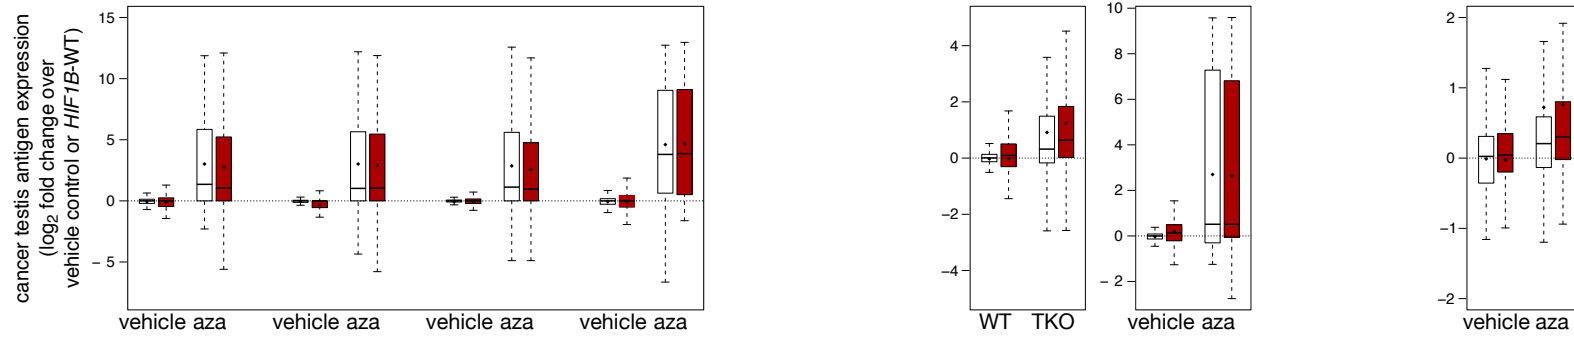

**Fig. S2 | Expression of hypoxia genes and cancer testis antigens**

(a) mRNA expression of hypoxia-induced genes in human and mouse cell lines and in 4T1 tumours. Shown is the average fold change of transcript per million over the appropriate control. (b) mRNA expression of cancer testis antigens in human cell lines, in 4T1 cells and mESCs exposed to hypoxia, DMOG, aza or deficient for the indicated gene (TKO for *Dnmt*). Shown are boxplots of  $\log_2$  transcripts per million normalized over the proper control.

Figure S3

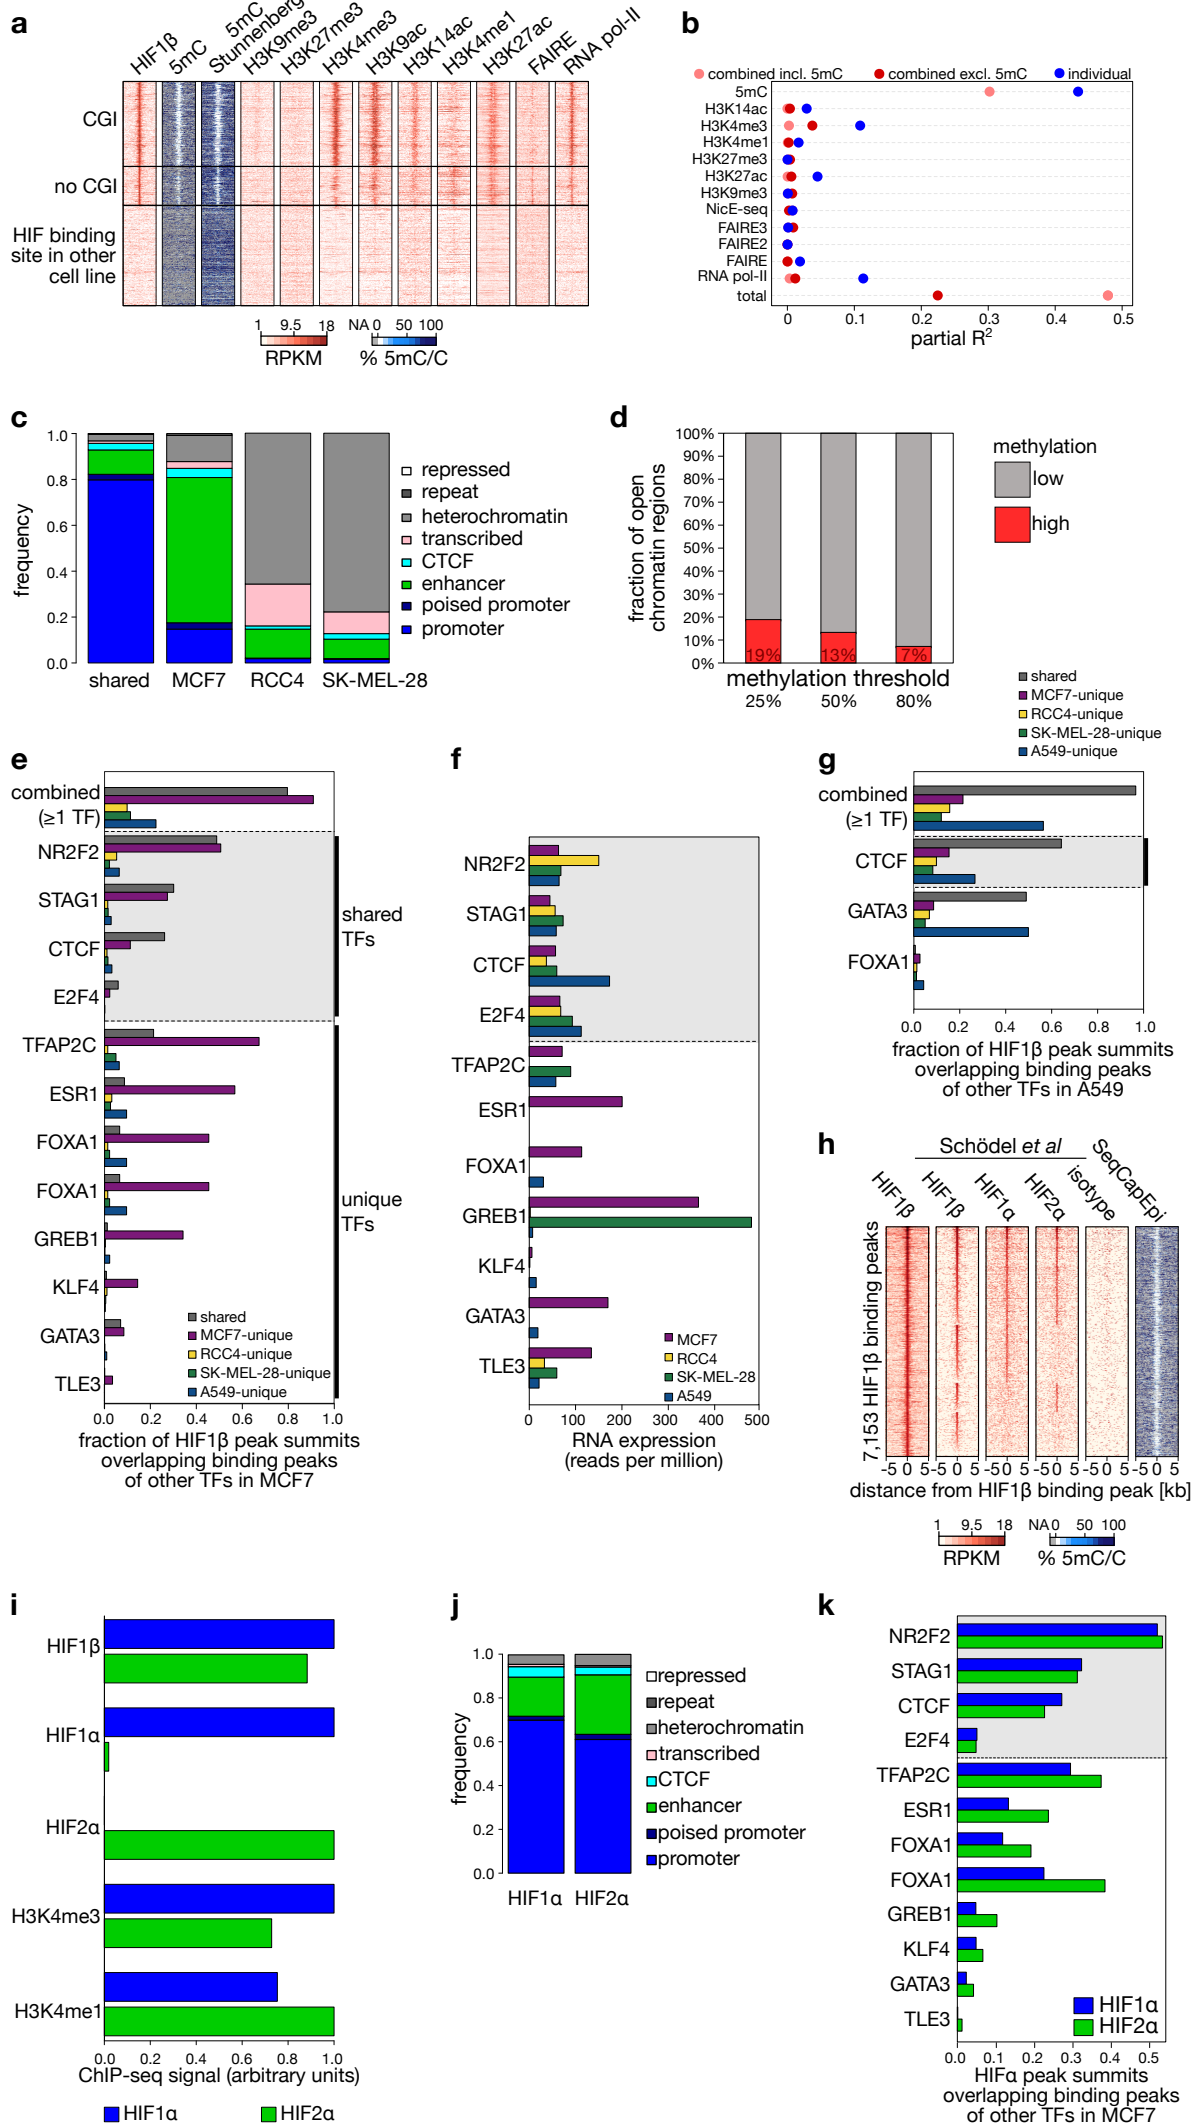

### Fig. S3 | Cell-type-specific HIF1 $\beta$ binding

(a) Patterns of DNA methylation and of the indicated chromatin modifications in MCF7 cells, at HIF1 $\beta$  binding sites detected in MCF7 cells at CpG islands (*top*), not at CpG islands (*middle*) or in SK-MEL-28 and/or RCC4 cells but not MCF7 (*bottom*). DNA methylation was determined using SeqCapEpi BS-seq or WGBS; occupancy of chromatin modifications was determined using the ENCODE project. (b) Estimates of the contribution of individual epigenetic marks in predicting the presence of HIF1 $\beta$  binding peaks, as determined by partial  $R^2$  analysis of linear regression models. Shown are the results of a linear model using all available marks, a linear model using all available marks but not DNA methylation, and the results of linear models using each modification in an individual analysis. All 3 available FAIRE-seq datasets[68, 69] show similar results. (c) Functional genome annotation of MCF7 cells using ChromHMM, at shared and cell-type-specific HIF1 $\beta$  binding peaks. (d) Fraction of regions in MCF7 cells showing high *versus* low methylation in regions of open chromatin. 10,805 regions of open chromatin that showed high GpC methylation levels were assessed (>10-fold coverage) for their CpG methylation. Indicated are the fraction of these 10,805 regions showing at least 25%, 50% or 80% CpG methylation. GCG trinucleotides were not considered in these analyses. (e) Fraction of HIF1 $\beta$  binding peaks, shared between or unique for a cell line, that overlaps with other TF binding sites detected in MCF7 cells. Note how HIF1 $\beta$  binding peaks unique to MCF7 cells (*purple*) predominantly overlap with TFs uniquely expressed in MCF7 cells (TFASP2C, ESR1, ...), while HIF1 $\beta$  binding peaks shared between cell lines (*dark grey*) more frequently overlap with commonly expressed TFs (NR2F2, STAG1, ...). (f) mRNA expression level of indicated transcription factors in each cell line, as determined using RNA-seq. These data enable stratification of TFs into those that are shared in expression (*light grey box*) and those that are uniquely expressed (*white box*). (g) Fraction of HIF1 $\beta$  binding peaks, shared between or unique for a cell line, that overlaps with other transcription factor binding sites detected in A549 cells. Note how HIF1 $\beta$  binding peaks unique to A549 cells (*blue*) predominantly overlap with TFs expressed in A549 cells (GATA3 and FOXA1), while HIF1 $\beta$  binding peaks shared between cell lines (*dark grey*) more frequently overlap with binding of CTCF, a commonly expressed TF. (h) Comparison of the HIF1 $\beta$  peaks detected to a previously published dataset of ChIP-seq for HIF1 $\beta$ , HIF1 $\alpha$  and HIF2 $\alpha$ . (i) ChIP-seq signal for the indicated epitopes at the 200 bps surrounding the HIF1 $\beta$  peak summits that are uniquely co-bound by HIF1 $\alpha$  or HIF2 $\alpha$ . (j) Functional genome annotation of MCF7 cells using ChromHMM, at HIF1 $\beta$  binding peaks that are uniquely co-bound by HIF1 $\alpha$  or HIF2 $\alpha$ . (k) Fraction of HIF1 $\beta$  binding peaks, uniquely co-bound by HIF1 $\alpha$  or HIF2 $\alpha$ , that overlaps with other transcription factor binding sites detected in MCF7 cells.

Figure S4

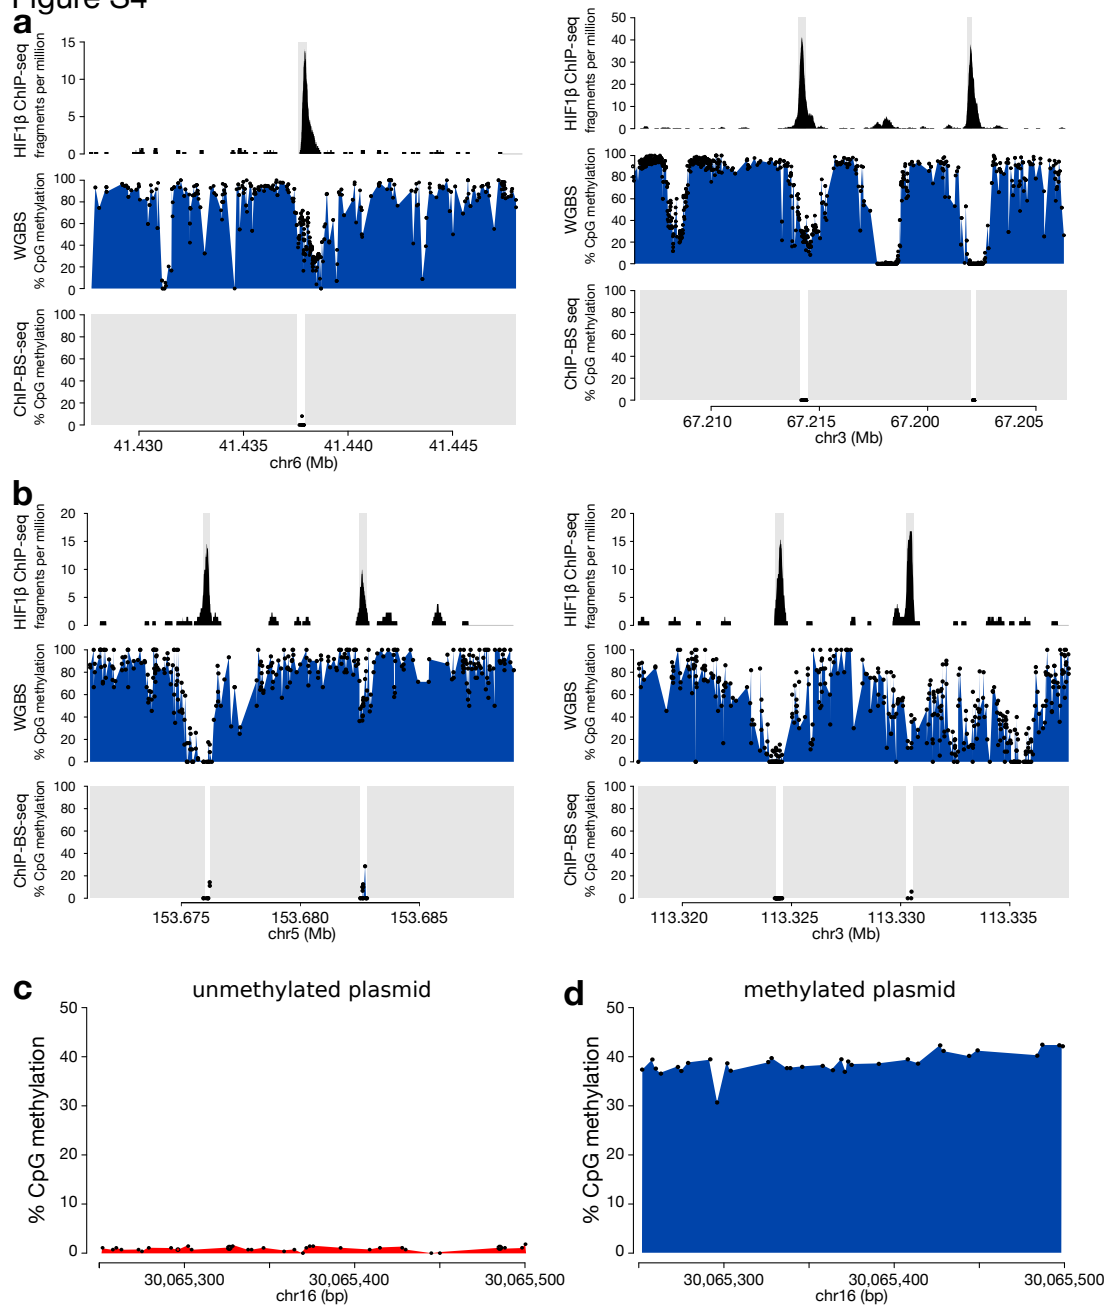



**Fig. S4 | DNA methylation directly repels HIF1 $\beta$  binding**

(a) Example plots of regions on chromosomes 6 and 16, showing HIF1 $\beta$  ChIP-seq read depths, and methylation levels as determined by whole-genome BS-seq and HIF1 $\beta$  ChIP-BS-seq in MCF7 cells. Coordinates: human genome build hg19. Grey boxes in HIF1 $\beta$  ChIP-BS-seq tracks indicate regions where insufficient sequences were recovered. (b) As in (a), but in murine *Tet*-TKO ESCs, and for regions on chromosomes 5 and 3. Coordinates follow genome build Mm10. In each example plot, HIF1 $\beta$  peaks (fragment per million) are shown on top; percentage of DNA methylation (calculated in bulk normoxic cells by WGBS) at the same position of the HIF1 $\beta$  peaks is shown in the middle; percentage of DNA methylation of the immunoprecipitated DNA fragment from HIF1 $\beta$  ChIP-BS-seq is shown at the bottom. (c-d) Methylation levels of a human DNA fragment inserted in mESCs, as detected using amplicon bisulfite sequencing. A human HIF binding site (chr16: 30,065,212-30,065,711 on hg38) was cloned between 2 L1 *Lox* sites and *in vitro* methylated (d) or not (c) prior to insertion into mESCs transformed to contain an L1 *Lox*-flanked thymidine kinase.

Figure S5

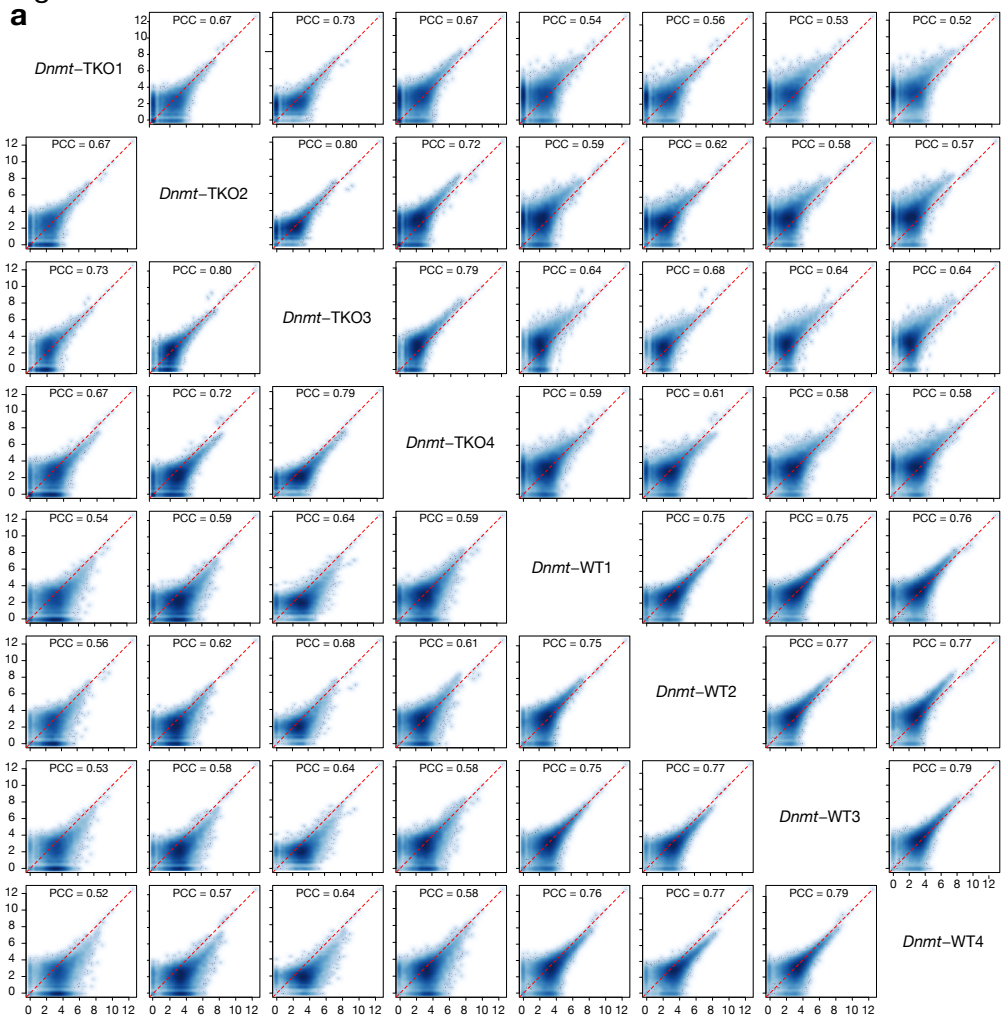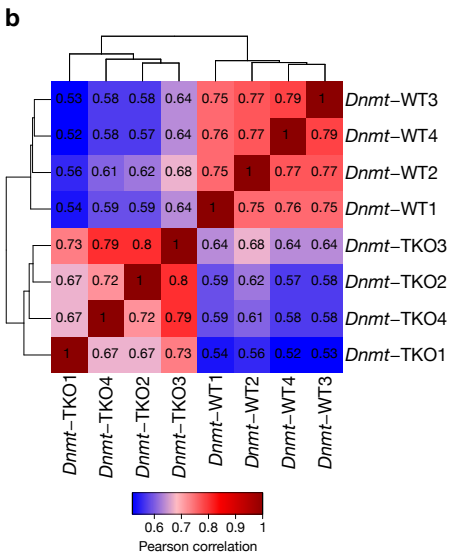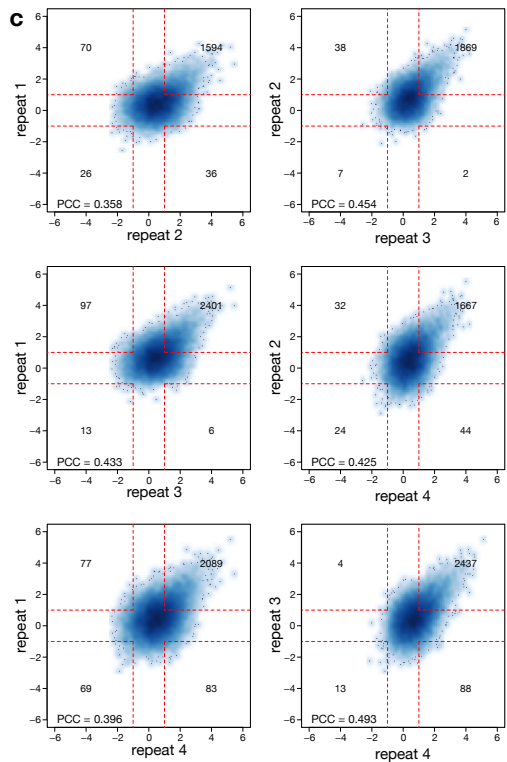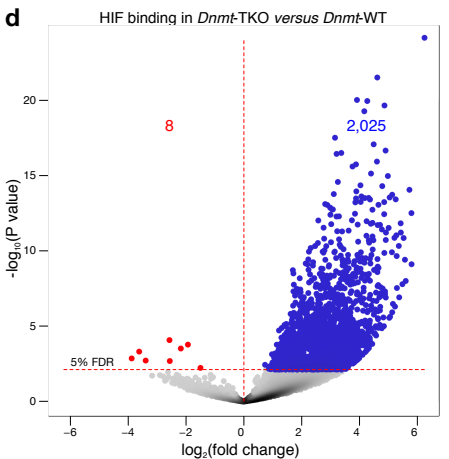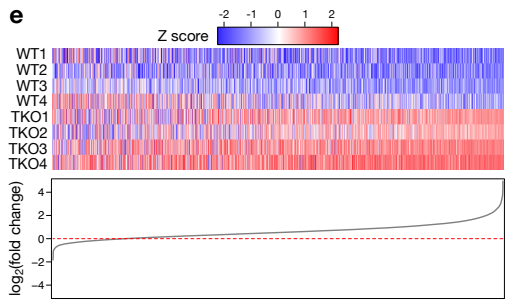

**Fig. S5 | Quality control of the ChIP-seq replicates**

(a) Smooth-scatter heatmaps for each experimental HIF1 $\beta$  ChIP-seq repeat, showing pairwise comparisons of the read depth ( $\log_2(\text{RPKM}+1)$ ) at a peak set representing the union of peaks detected in WT and *Dnmt*-TKO cells. (b) Hierarchically clustered heatmap of Pearson correlations between the  $\log_2$  read counts of all replicates for a peak set representing the union of all peaks in WT and *Dnmt*-TKO cells. Note how Pearson correlations between replicates of the same genetic background are higher than the correlations across the two genetic background. (c) A merged peak set (union of all peaks in WT and *Dnmt*-TKO cells) was generated, and the difference between the ChIP-seq signals ( $\log_2(\text{RPKM}+1)$ ) of these peaks of *Dnmt*-TKO and WT), was calculated for each of the 4 repeats. These repeats are here compared with a smooth-scatter heatmap. Also indicated are the associated Pearson Correlation Coefficients (PCC), as well as the number of peaks showing >2-fold change between both repeats. (d) Results of EdgeR analysis of differences in ChIP-seq signal strength between the 4 HIF1 $\beta$  ChIP-seq replicates. Shown are the significant differences between the 4 wild-type and 4 *Dnmt*-TKO (TKO, red) replicates. Dots colored in red and blue indicate peaks showing respectively decreased and increased binding in *Dnmt*-TKO cells *versus* WT cells. (e) Heatmaps showing the relative signal of the 4 HIF1 $\beta$  ChIP-seq data replicates, ranked by their mean fold change (quantified below). Shown are 4 wild-type (WT, blue) and 4 *Dnmt*-TKO (TKO, red) replicates.

**Figure S6**

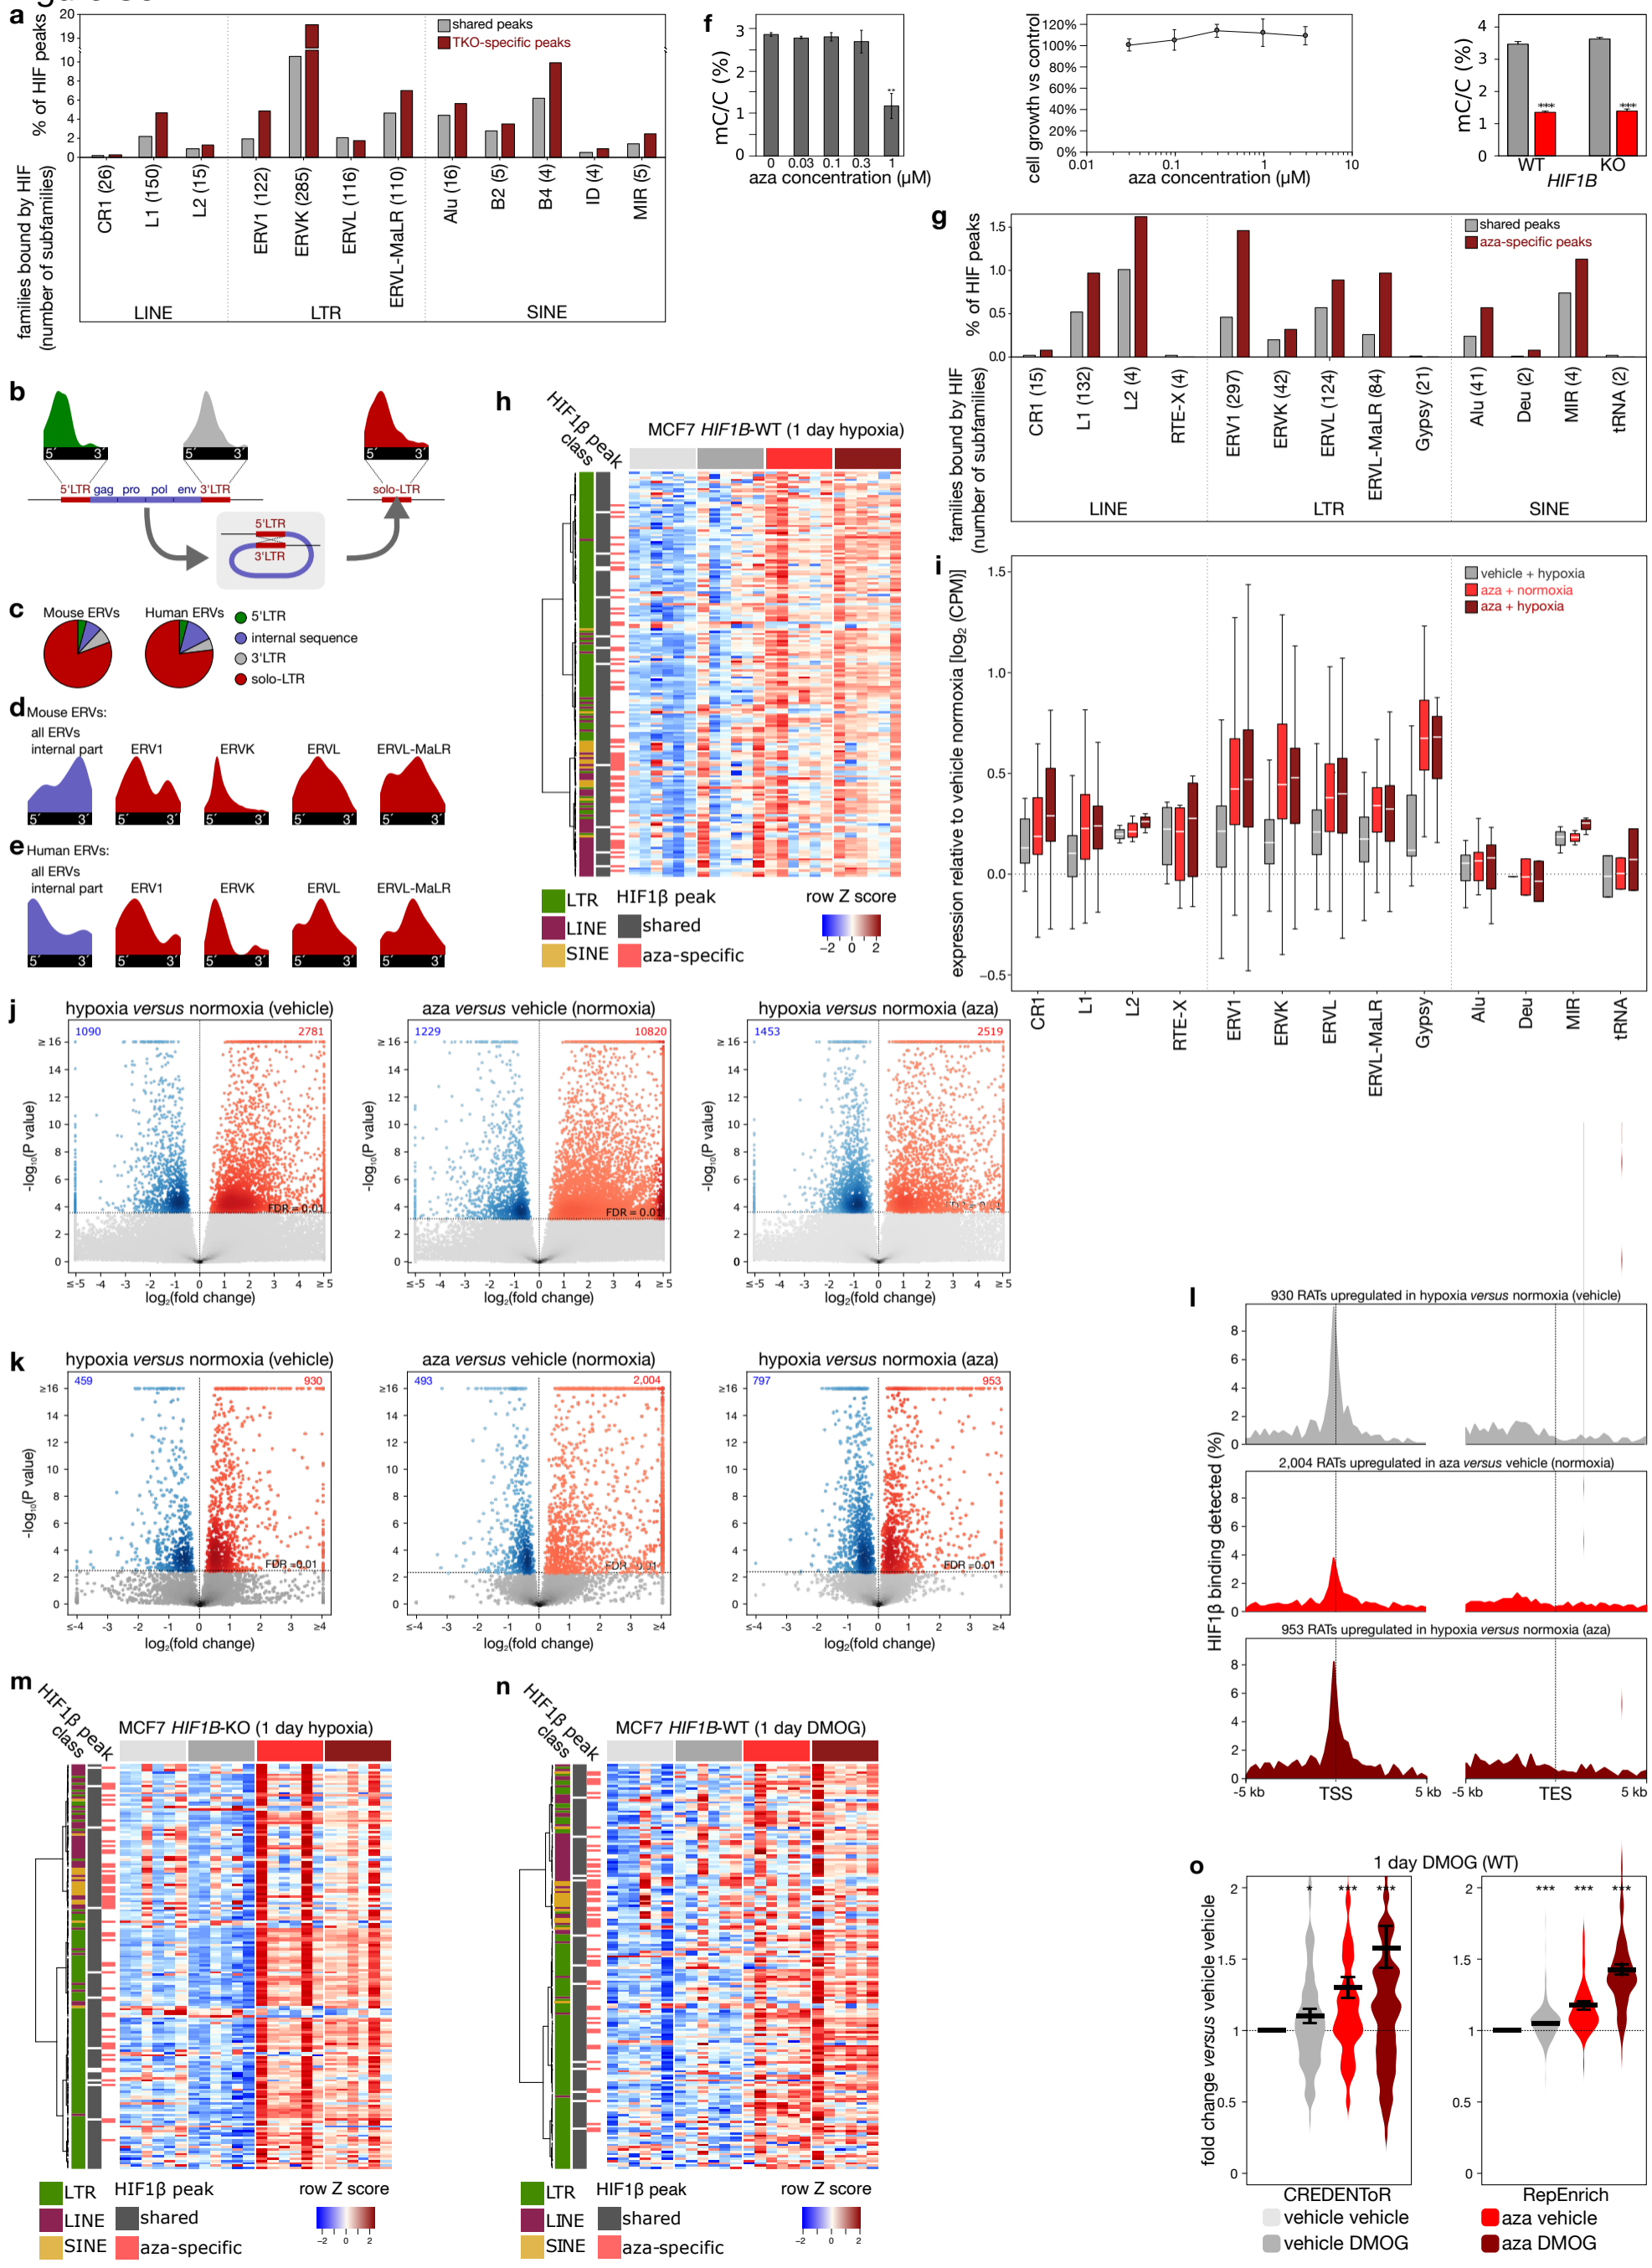

### Fig. S6 | HIF binds retrotransposons in demethylated genomes

(a) % of shared or *Dnmt*-TKO-specific (TKO-specific) HIF1 $\beta$  binding peaks in ESCs that overlap retrotransposons, grouped by retrotransposon class and family. Families bound less than 3 times by HIF1 $\beta$  (Dong-R4, Jockey, Penelope, RTE-X, Gypsy, 5S-Deu-L2, tRNA, tRNA-Deu) or containing unclassifiable subfamilies are not shown. The number of retrotransposon subfamilies involved is indicated in brackets. (b) HIF binding at long terminal repeats (LTRs, red) and internal sequences (blue). A solo-LTRs arise through non-allelic homologous recombination of the 5' and 3' LTRs (*bottom*). Shown are (*top*) the HIF binding sites in murine ERVK LTRs that are at the 5' or 3' end of the ERVK-internal sequence, or that are solitary ("solo-LTR"). As can be appreciated, these have a similar distribution of HIF binding sites. (c) Fraction of HIF binding sites in 5', 3' or solo LTRs or in internal sequences, and this in murine ES cells (*left*) and MCF7 cells (*right*). (d-e) Distribution of HIF binding at ERV internal sequences (all combined, *blue*) and at ERV1, ERVK, ERVL and ERVL-MaLR LTRs (*red*) in murine ES cells (*d*) and MCF7 cells (*e*). LTRs are grouped by subfamily, irrespective of whether they are 5', 3' or solo LTRs. As the total number of HIF binding sites in the internal sequence was too low for reliably generating density plots, we merged all subfamilies. (f) Validations of aza treatment. 5mC content of DNA (*left*) and survival (*middle*) of WT MCF7 cells, exposed to various concentrations of 5-aza-dC, and (*right*) 5mC content of DNA from WT and *HIF1B*-KO MCF7 cells, exposed to 5-aza-dC (aza; 1  $\mu$ M, red) or DMSO (control, grey) for 3 cell cycles, as determined using LC/MS. (g) As in (a), but for HIF1 $\beta$  binding peaks that are shared between vehicle- and aza-treated MCF7 cells, or specific to aza-treated MCF7 cells. (h) Heatmap showing expression of 176 retrotransposon subfamilies bound by HIF1 $\beta$  in hypoxic and normoxic MCF7 cells exposed to vehicle (DMSO) or aza. Expression was determined using RepEnrich (n=6 per treatment condition). (i) Differential expression of 13 retrotransposon families bound by HIF1 $\beta$ . Boxplots show average read counts from RNA-seq analyses of vehicle- and aza-treated MCF7 cells exposed for 24 hours to normoxia or hypoxia (resp. 21% and 0.5% O<sub>2</sub>), as determined using RepEnrich (n=6 per condition). Families not bound by HIF1 $\beta$  or containing unclassifiable subfamilies are not shown. (j) Volcano plots showing differential expression of retrotransposon loci, as determined by SQuIRE analysis of MCF7 cells exposed for 4 days to vehicle or aza (1  $\mu$ M), and for 1 day to hypoxia (0.5% oxygen) or normoxia. Significantly upregulated and downregulated loci (1% FDR, horizontal line) are highlighted in red and blue, respectively, with the number of loci being indicated. (k) as in (j) but for all cryptic transcripts, also those not bound by HIF1 $\beta$ , using an analysis performed with CREDEnTOr. (l) HIF binding sites detected at the TSS and transcription end site (TES) of cryptic transcripts overexpressed (1% FDR) in MCF7 cells exposed to hypoxia and/or aza. Shown are percentages of 250 bp bins wherein a HIF binding peak was detected. (m-n) Heatmap showing the expression of 176 retrotransposon subfamilies bound by HIF1 $\beta$  in *HIF1B*-KO MCF7 cells exposed to hypoxia (0.5% O<sub>2</sub>) for 24 hours and treated with vehicle or aza (*m*) and in WT (*HIF1B*-WT) MCF7 cells exposed to dimethylxallylglycine (DMOG; 2 mM) for 24 hours and treated with vehicle or aza (*n*). Expression was determined using RepEnrich (n=6 per treatment condition). (o) Expression of HIF-bound cryptic transcripts (CREDEnTOr, *left*) and retrotransposon subfamilies (RepEnrich, *right*) relative to vehicle-treated control (vehicle) in MCF7 cells wild-type (WT) for *HIF1B*. \*P<0.05, \*\*\*P<0.001 by t-test.

Figure S7

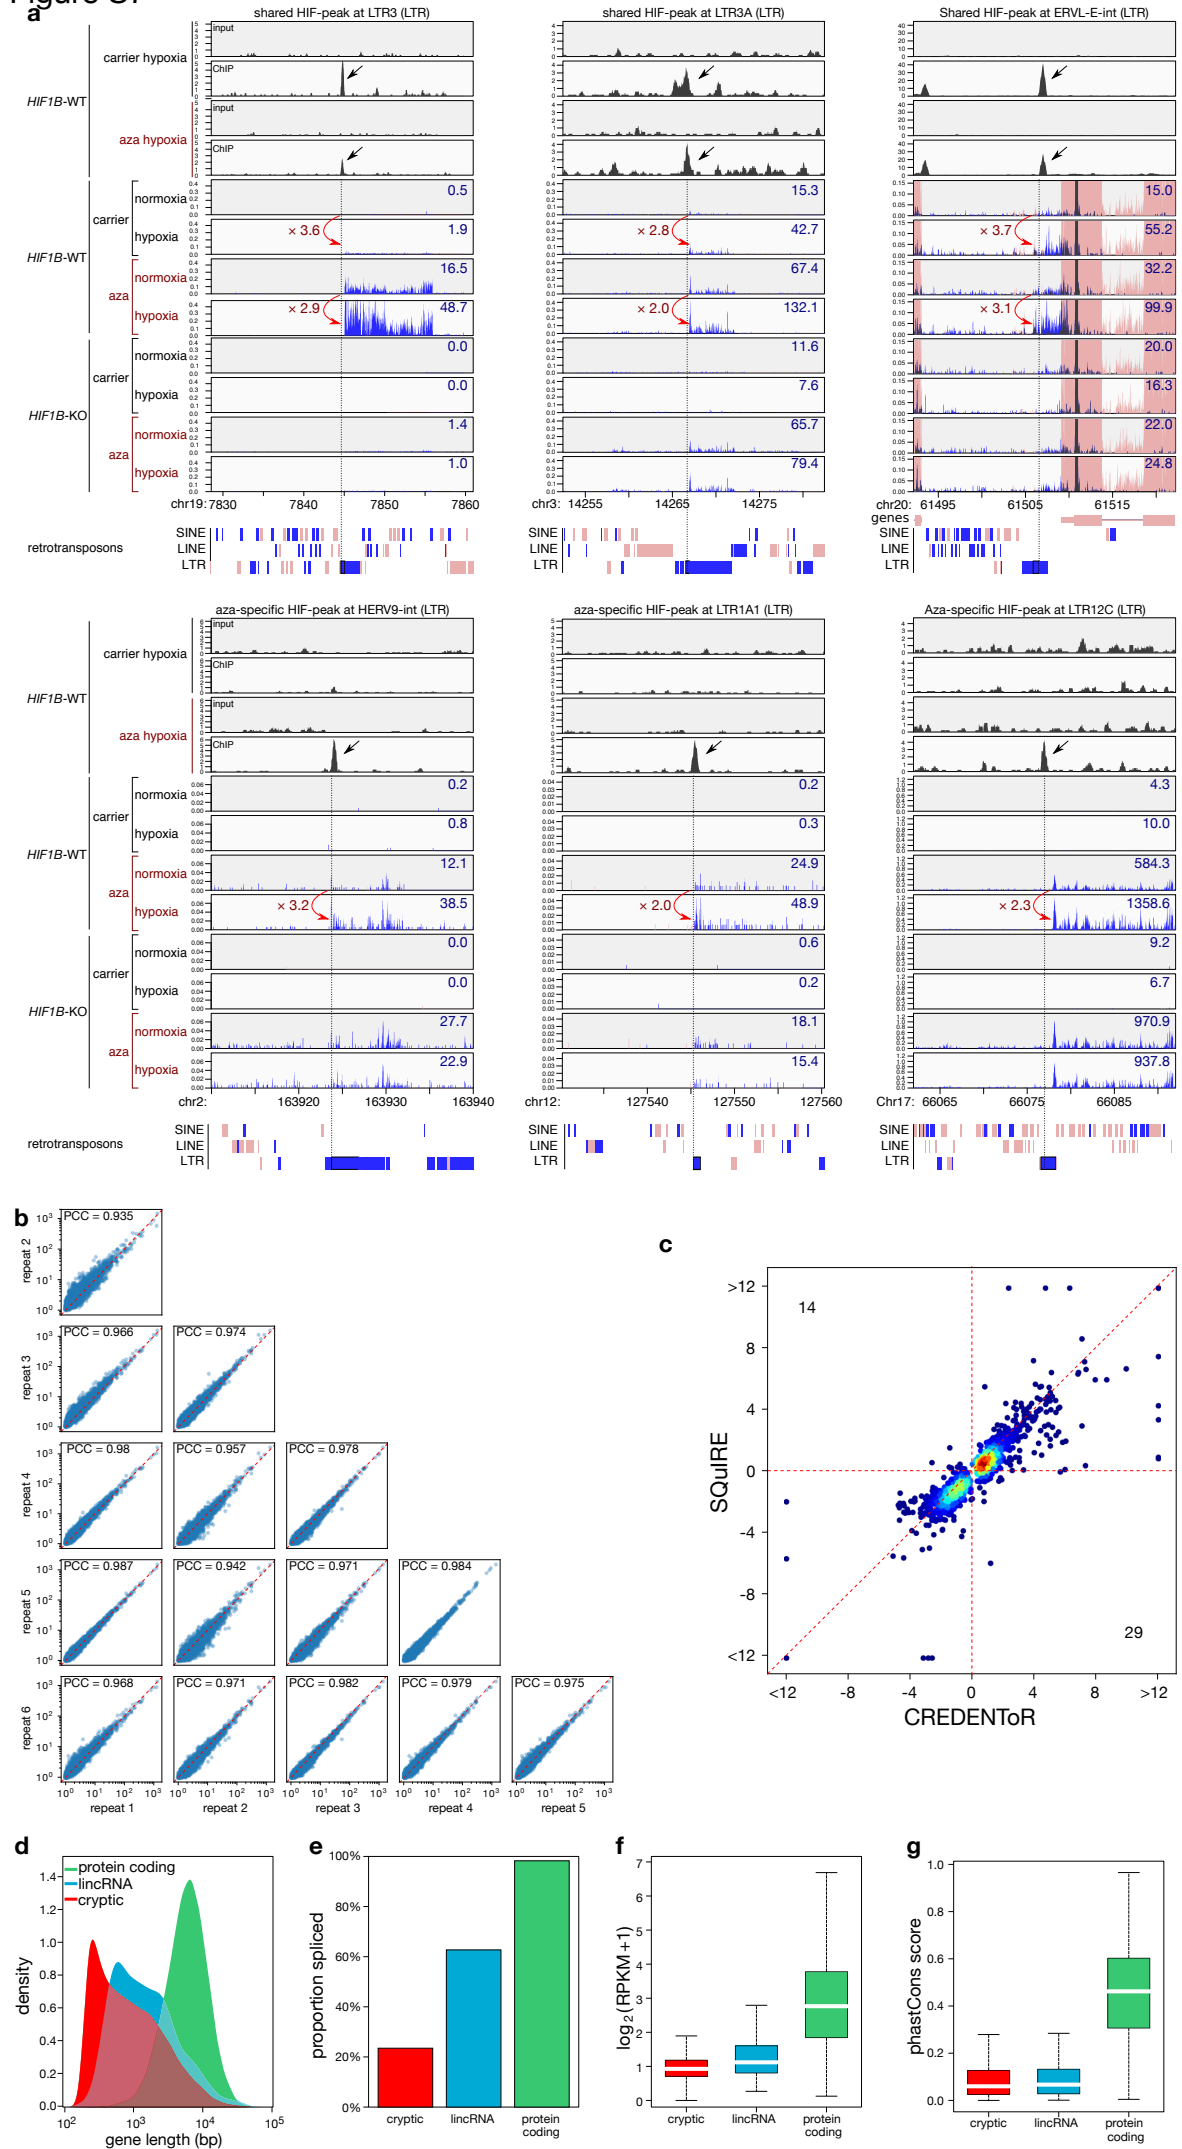

**Fig. S7 | Examples of cryptic transcripts upregulated by HIF1 $\beta$**

(a) Examples of HIF1 $\beta$  binding near cryptic transcripts (*top 4 tracks*) and the associated induction of RNA expression (*bottom 8 tracks*). Shown are 3 regions of 30 kb surrounding a HIF1 $\beta$  binding peak that is shared between vehicle-treated and aza-treated MCF7 cells (*top*) and 3 30 kb regions surrounding a HIF1 $\beta$  binding peak that is specifically detected in aza-treated MCF7 cells (*bottom*). Peaks of interest are indicated with an arrow, quantified expression levels of the cryptic transcripts (RPM; upper right corner), and the associated fold changes in expression (red arrow) are shown. As RNA-seq was directional, reads mapping to the top strand (*red*) or the bottom strand (*blue*) are shown. These reads are derived from the cDNA, and thus represent RNA transcripts derived from the bottom (*red*) or top (*blue*) strand respectively. Overlapping reads from both strands are coloured in dark grey. ChIP-seq was not directional. MCF7 cell genotypes (*HIF1B*-WT or -KO) and treatments (aza or vehicle; hypoxia or normoxia) are indicated on the left. At least 3 of the observed cryptic transcripts consist of multiple repeat elements and are thus characterized by read-through of the individual repeat. X-axis: chromosome positions are annotated in kb according to human genome build hg19; Y-axis: reads per kb per million reads. (b) Reproducibility of CREDENToR in determining transcript levels (*left*) and hypoxia-induced changes (*right*) in 6 replicates of MCF7 cells exposed to 1 day of hypoxia. PCC: Pearson Correlation Coefficient. (c) Comparison between repeat transcript expression estimates obtained by CREDENToR and SQUIRE. (d-g) Characterization of key features of the cryptic transcripts detected using CREDENToR, in comparison to annotated long intergenic non-coding RNAs (lincRNAs) and protein coding RNAs. Shown are the transcript lengths (*d*), the fraction of transcripts that are spliced (*e*), the RNA expression (*f*) and the conservation estimated using the average phastCon score per transcript (*d*). RPKM: reads per million reads and per kb.

Figure S8

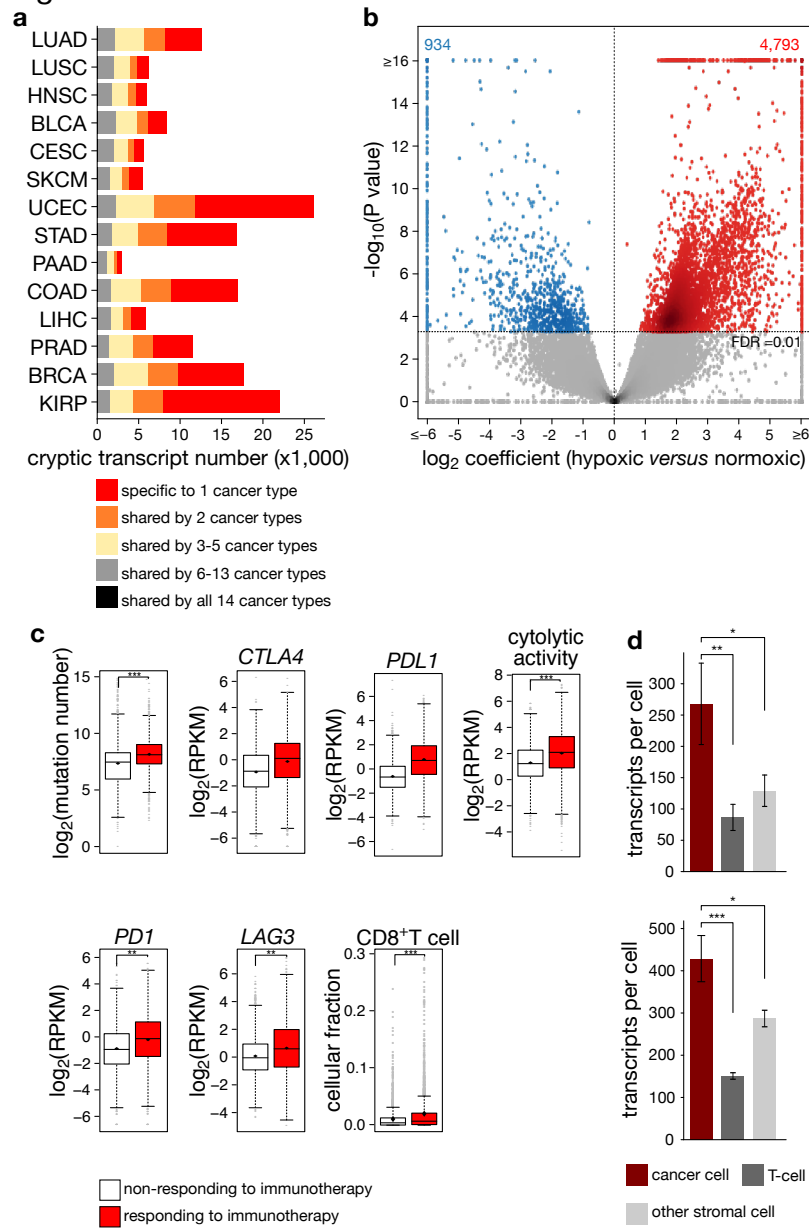



### Fig. S8 | Cryptic transcript expression in TCGA tumours

(a) Recurrent detection of cryptic transcripts in different cancer types profiled in TCGA. Shown are the number of cryptic transcripts detected in 1 cancer type or in different cancer types, as per the legend. (b) Volcano plot showing the effect of the interaction between cryptic transcript DNA methylation and tumour oxygenation on the expression of individual cryptic transcripts, tested by DESeq. Positive coefficients represent the cooperative enhancement of cryptic transcript expression in low-methylation, hypoxic conditions. Highlighted in red and blue are significantly positive and negative coefficients (5% FDR) respectively. (c) Immunogenicity estimates for TCGA tumours responsive or non-responsive to immunotherapy as described by Turajlik and colleagues[38] (*red and white*). Shown are number of somatic mutations extracted from the TCGA database, mRNA expression of *PDL1*, *PD1* and *LAG3* as  $\log_2$  RPKM, cytolytic activity (CYT) defined as the  $\log_2$ -average (geometric mean) of *GZMA* and *PRF1* expression in RPKM, cell fraction for CD8<sup>+</sup> T-cells estimated with respect to the total cells in the sample as defined by quanTIseq (The Cancer Immunome Atlas, TCIA[67]), and cryptic transcript expression as  $\log_{10}$  counts per million. \*\* $P < 0.01$  and \*\*\* $P < 0.001$  by t-test. (d) The number of cryptic transcripts expressed in cancer cells, T-cells and other stromal cells isolated from non-small cell lung tumours (left, n=5) or from breast tumours (right, n=22) and profiled using single-cell RNA-sequencing.[64] Note that this expression dataset was generated using unique molecular identifiers at the 3'-end or 5'-end of poly-adenylated transcripts (resp. left and right panel), enabling the counting of transcripts per cell.

Figure S9

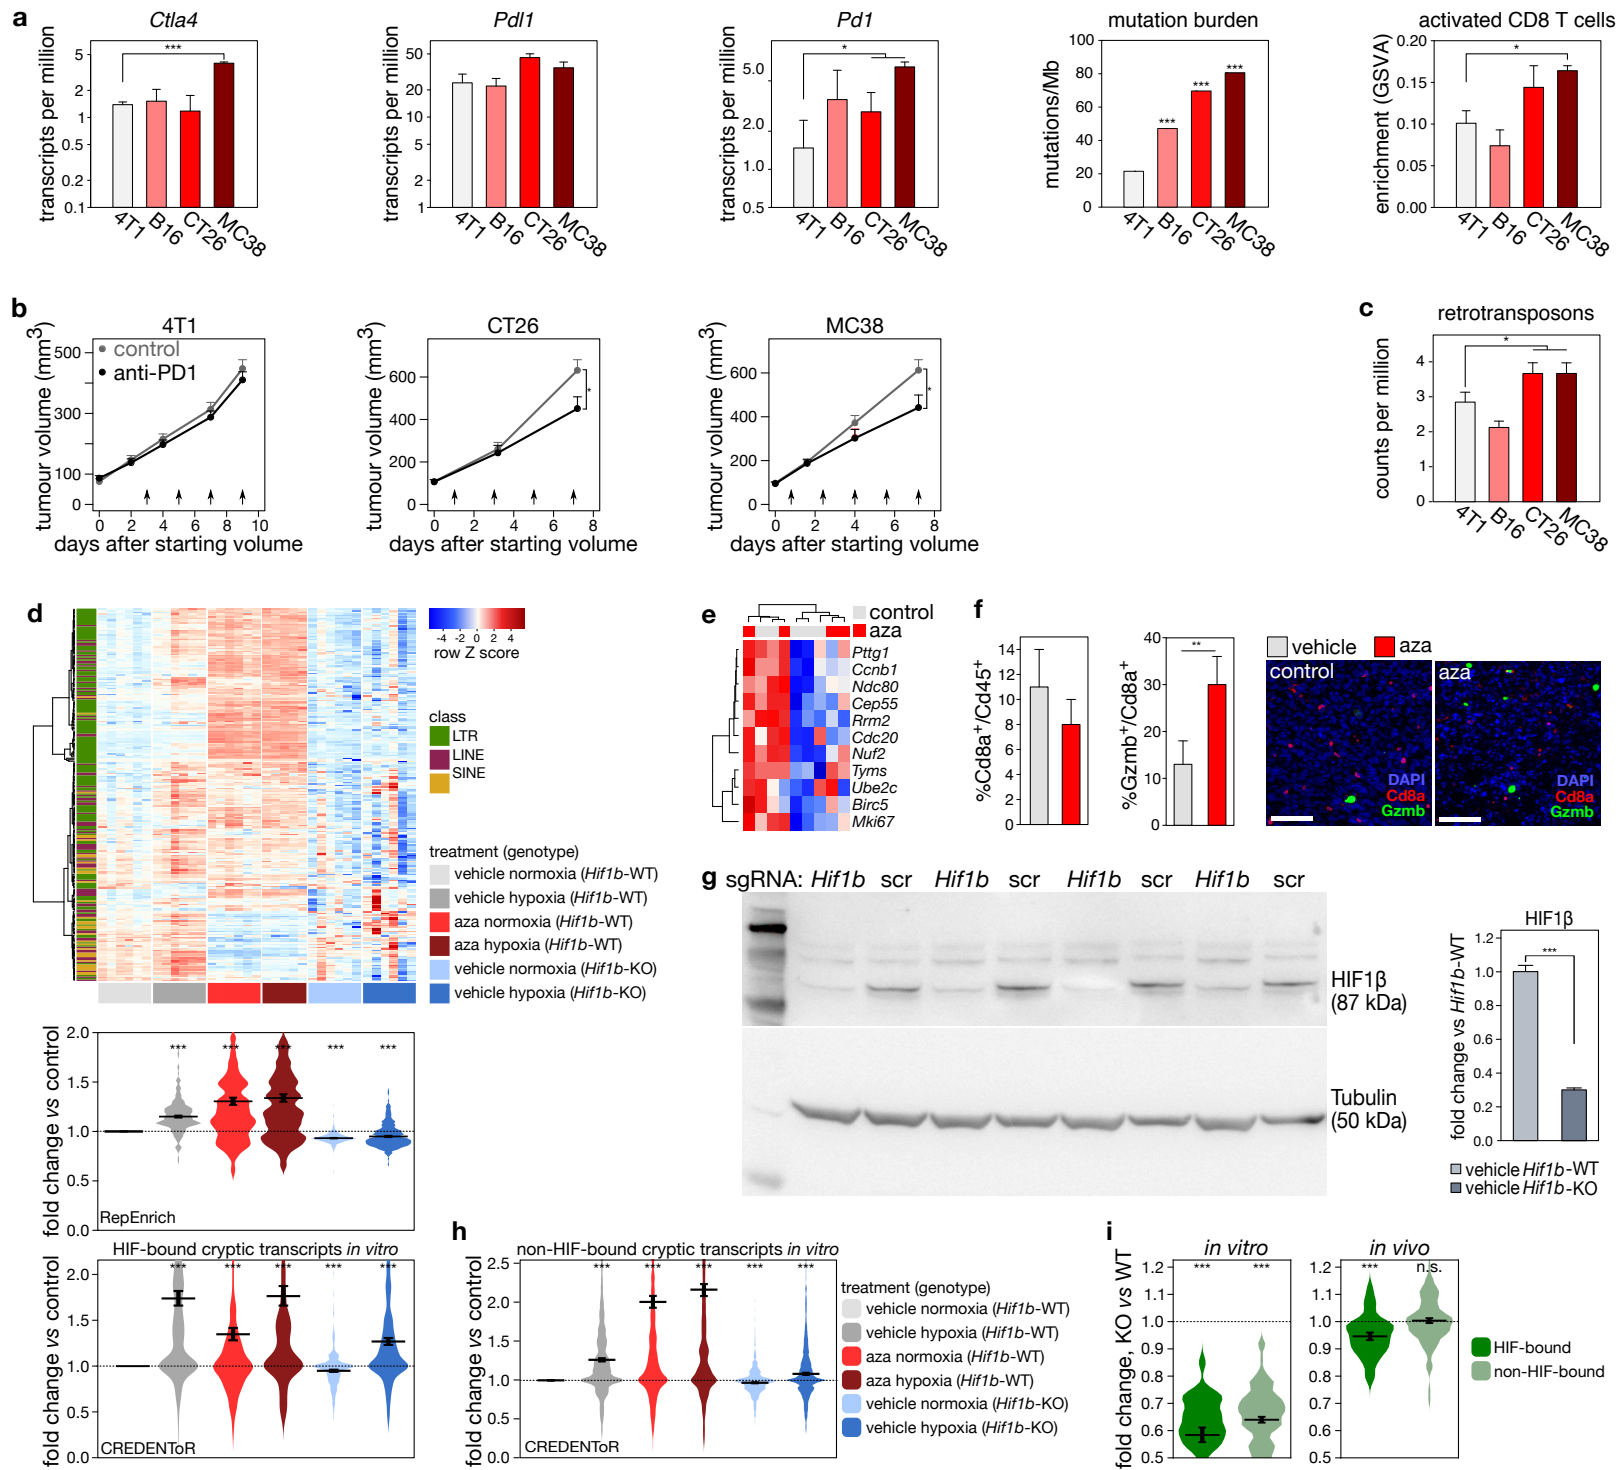

### Fig. S9 | Aza treatment increases immunogenicity

(a) Immunogenicity estimates in cell line grafted (4T1, B16, CT26 and MC38) mouse tumour models. Shown are TMB expressed as the number of mutations per Mb of expressed coding DNA sequence (CDS), mRNA expression (transcripts per million, TPM) of *Pd1* and *Pd1* immune checkpoint molecules and activated CD8<sup>+</sup> T-cell enrichment estimated through gene set variance analysis (GSVA) of immune metagenes. (b) Growth of tumours generated by grafting mice subcutaneously with CT26 and MC38, or orthotopically with 4T1 cells. Mice were treated with anti-PD1 or control IgG antibody (see Methods). Data represent estimated mean and s.e.m. from 3 independent experiments, each with at least n=6 per group. Arrows indicate treatment times. \* P<0.05 by repeated measurement analysis. (c) Cryptic transcript expression (average counts per million + s.e.m.) in cell line grafted (4T1, B16, CT26 and MC38) mouse tumour models. (d) Heatmap (*top*) and violin plots (*bottom*) showing the expression of cryptic transcripts (bound by HIF1 $\beta$  in 4T1 cells) in 4T1 cells WT (*Hif1b*-WT) or deficient (*Hif1b*-KO) for *Hif1b* exposed to hypoxia for 24 hours (0.5% O<sub>2</sub>) and treated with vehicle or aza; expression of retrotransposon subfamilies using RepEnrich (*top violin plot*) and of cryptic transcripts was determined using CREDENToR (*bottom violin plot*) (at least n=5 per treatment condition). Difference in the distribution of cryptic transcript expression is denoted as fold change of counts per million over vehicle-treated and normoxic 4T1 cells. \*\*\*P<0.001 by paired t-test. (e) Heatmap showing the expression of a proliferation gene signature<sup>1</sup> in 4T1 tumours from mice treated with either aza or PBS (at least 6 mice per treatment condition were sequenced). Samples and genes were unsupervisedly clustered. Aza-treated tumours do not appear to form a more proliferative subset of samples. (f) Quantification of CD8<sup>+</sup> and granzyme b (Gzmb)<sup>+</sup> cells, depicted as percentages of CD45<sup>+</sup> cells and CD8<sup>+</sup> cells, from vehicle- or aza-treated 4T1 tumours bearing mice and representative immunofluorescence images (scale 50  $\mu$ m). \*\*P<0.01 by t-test. (g) Immunoblot analysis (*left*) and mRNA expression (log<sub>2</sub> fold change *versus* WT) (*right*) of HIF1 $\beta$  in polyclonal 4T1 cells that are WT (*Hif1b*-WT) or KO (*Hif1b*-KO) for *Hif1b* (see Methods). (h) Violin plot showing expression of cryptic transcripts unbound by HIF1 $\beta$  in 4T1 cells. Shown is expression as determined using CREDENToR in 4T1 cells WT (*Hif1b*-WT) or deficient (*Hif1b*-KO) for *Hif1b* exposed to hypoxia for 24 hours (0.5% O<sub>2</sub>) and treated with vehicle or aza. (i) Expression of cryptic transcripts significantly downregulated *in vitro* (1% FDR) in hypoxic *Hif1b*-KO 4T1 cells *versus* hypoxic WT 4T1 cells, and stratified into being HIF-bound and non-HIF-bound. Expression changes are shown for 4T1 cells grown *in vitro* (*left panel*), and for 4T1 tumours orthotopically grafted in mice (*right panel, in vivo*). \*\*\*P<0.001; \*\*P<0.01; \*P<0.05 by t-test.

MCF7

kDa **Hypoxia**

normoxia

hypoxia

normoxia

hypoxia

normoxia

hypoxia

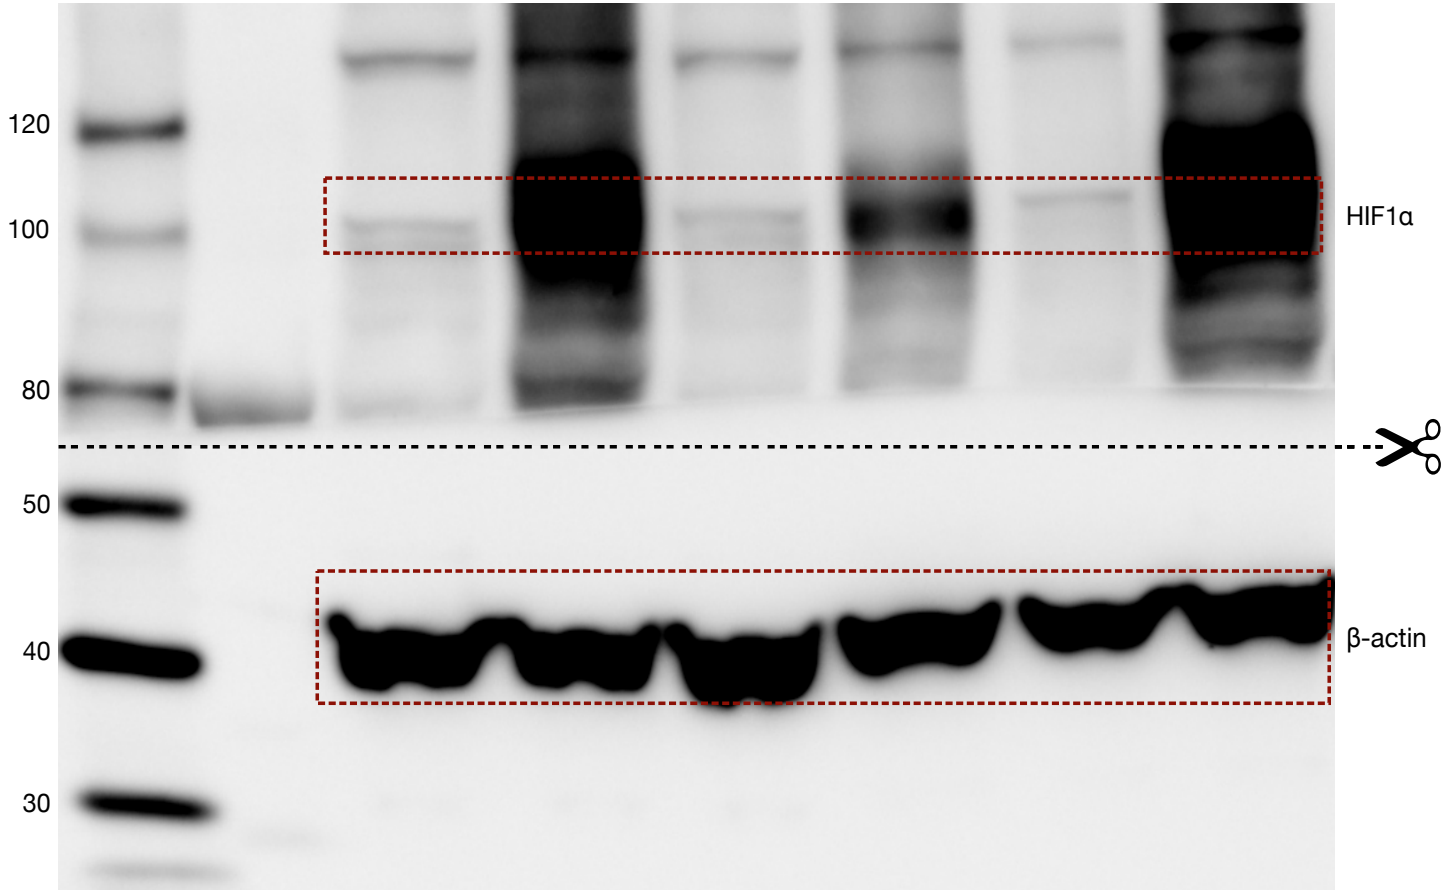

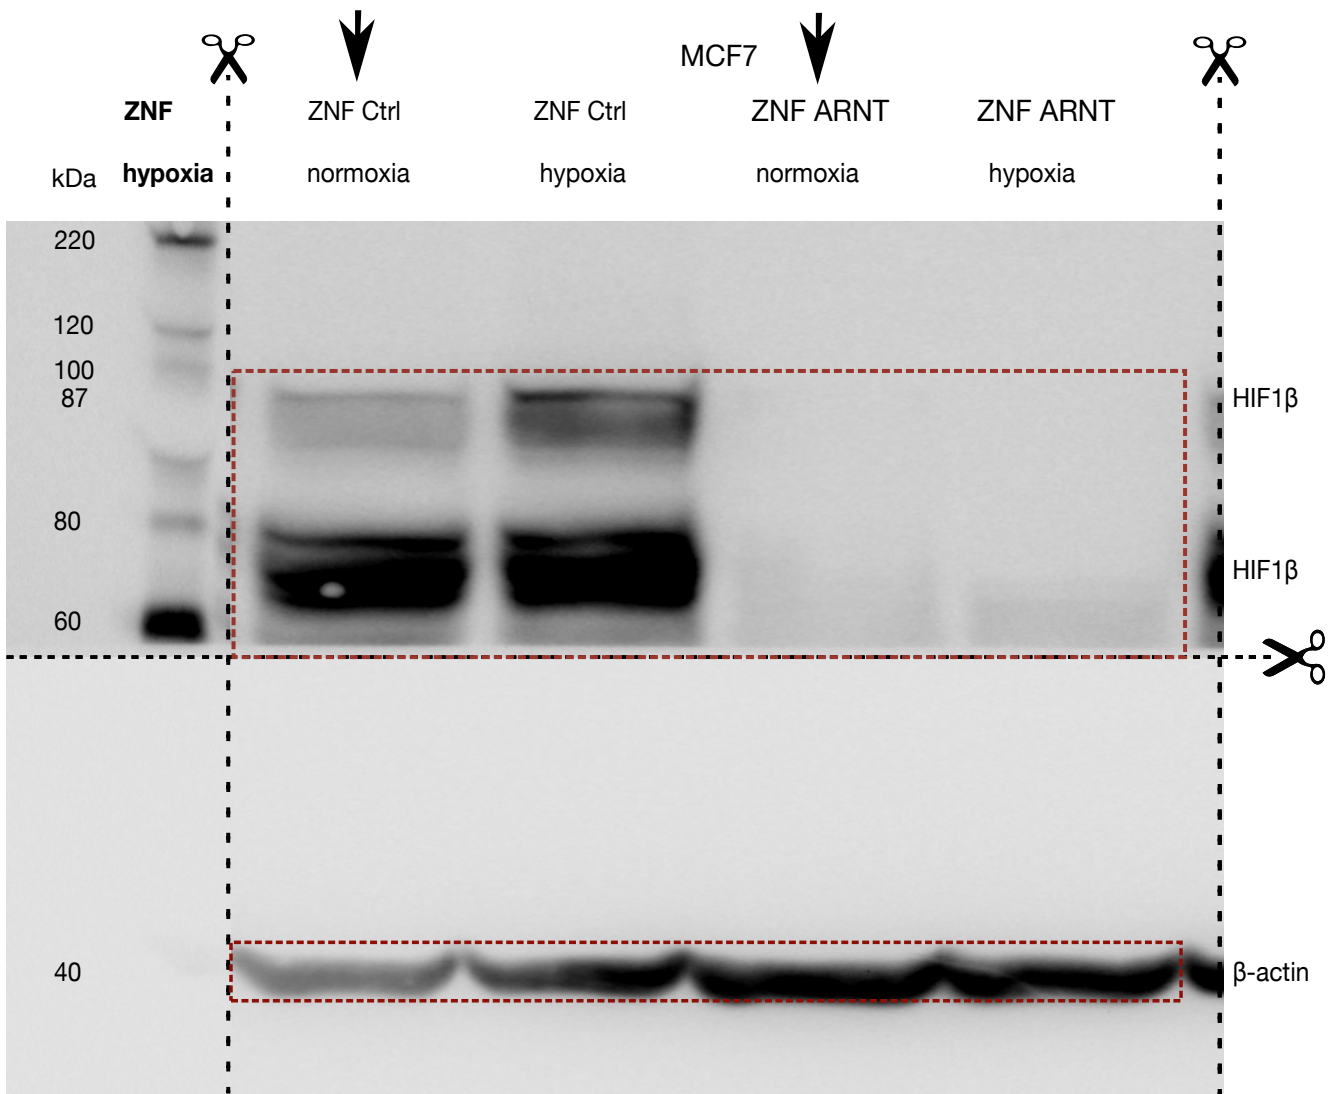

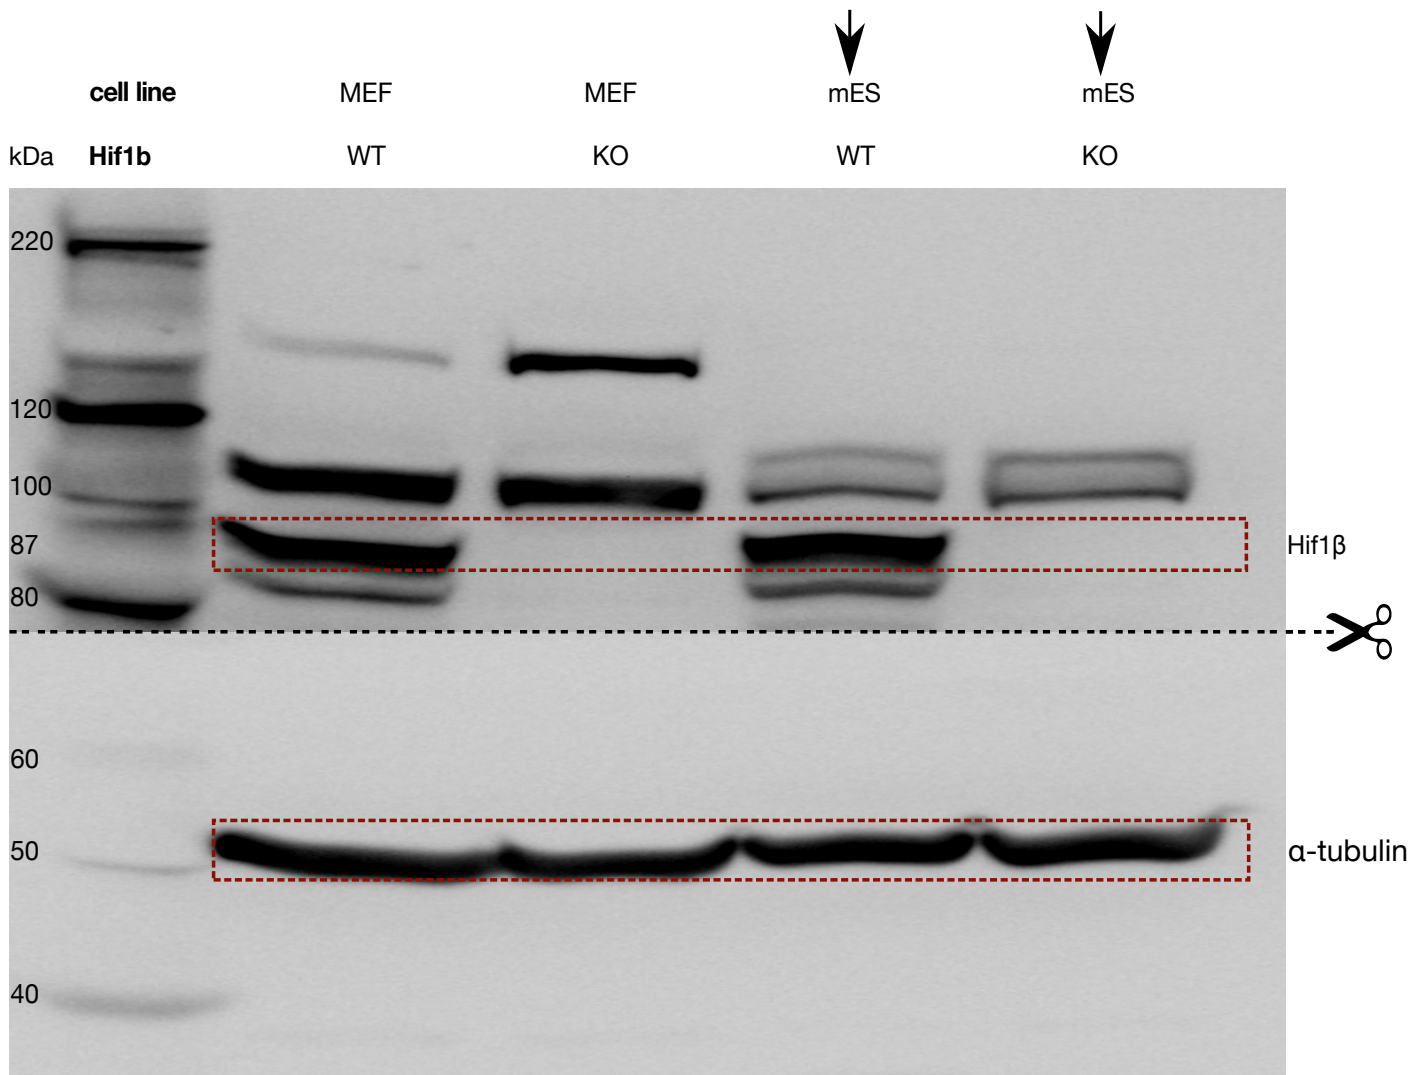

Supplement: 13059_2020_2087_MOESM1_ESM.pdf [file 13059_2020_2087_MOESM1_ESM.pdf]
